# Supplementary material for: Alterations in ALK/ROS1/NTRK/MET drive a group of infantile hemispheric gliomas
Source: PubMed Central journal article supplement (PMC6761184; doi:10.1038/s41467-019-12187-5), 2019-09-25
Supplement: 41467_2019_12187_MOESM1_ESM.pdf [file 41467_2019_12187_MOESM1_ESM.pdf]

## Supplementary Information

Alterations in ALK/ROS1/NTRK/MET drive a group of infantile hemispheric gliomas

Guerreiro Stucklin *et al.*

A

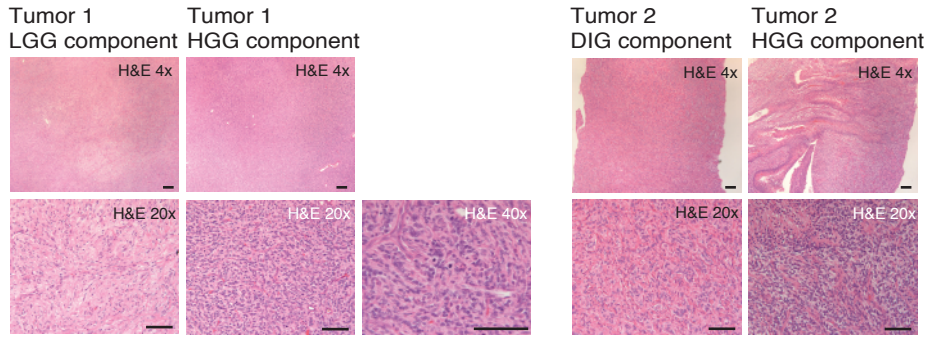

B

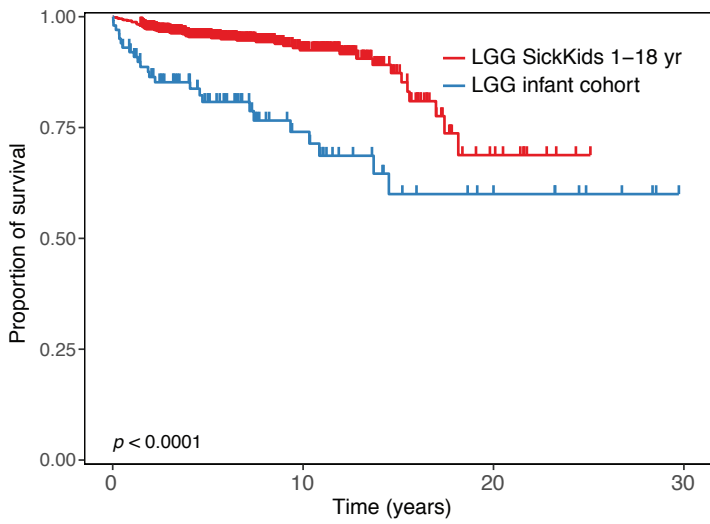

|        |     |     |    |   |
|--------|-----|-----|----|---|
| 1-18yr | 709 | 176 | 11 | 1 |
| iLGG   | 101 | 28  | 9  | 0 |

C

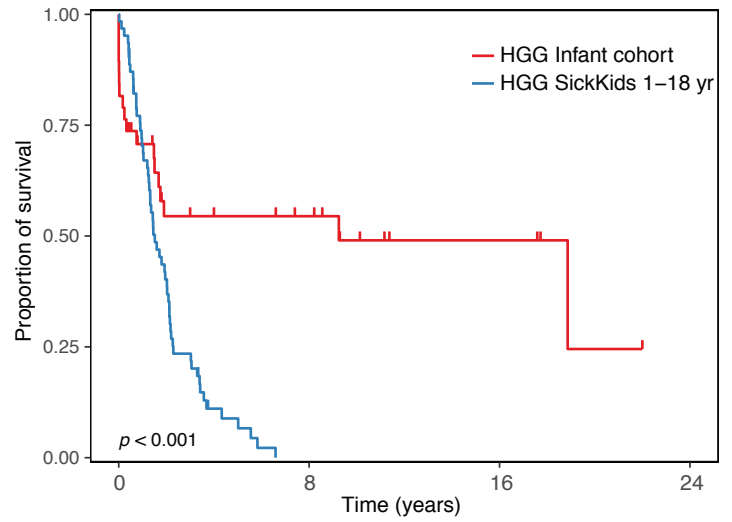

|         |    |    |   |   |
|---------|----|----|---|---|
| iHGG    | 38 | 12 | 4 | 0 |
| 1-18 yr | 64 | 0  | 0 | 0 |

Supplementary Figure 1. (A) Examples of 2 tumors with both LGG and HGG histological components as highlighted by Hemotoxylin and Eosin staining (H&E). All images are taken at the stated magnification, scale bar = 100  $\mu$ M, 200  $\mu$ M for 4x. (B) Overall survival (OS) of infants (infant cohort, <1 year of age) and children/adolescents aged 1-18 years (Sick Kids cohort) with LGG, p value calculated using the log-rank test. (C) OS of infants (infant cohort, <1 year of age) and children/adolescents aged 1-18 years (Sick Kids cohort) with HGG, p value calculated using the log-rank test.

LGG: low-grade glioma HGG: high-grade glioma

A

*CCDC88A*-ALK infant hemispheric LGG

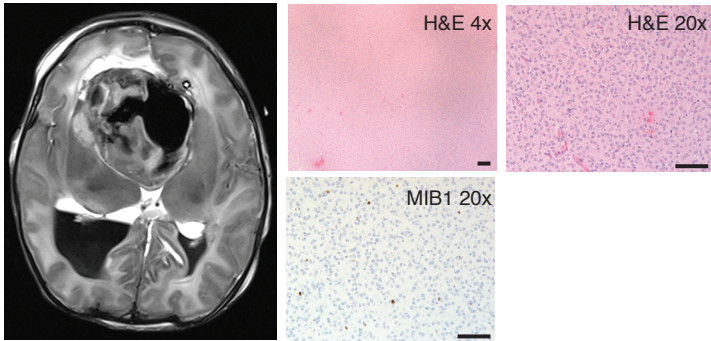

B

*CCDC88A*-ALK infant hemispheric HGG

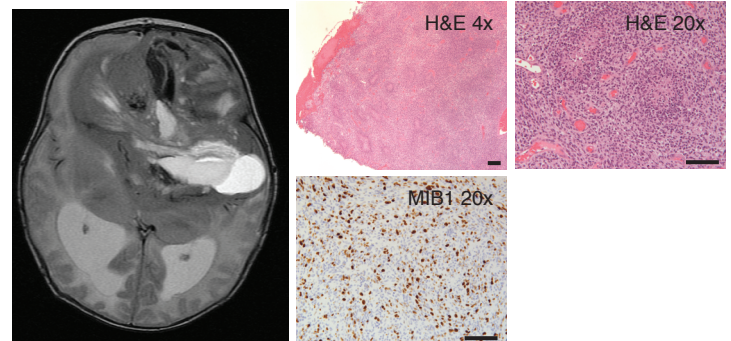



Supplementary Figure 2. Examples of CCDC88A-ALK positive infant gliomas with (A) low-grade glioma (LGG) histology and (B) high-grade glioma (HGG) histology. Panels include hemotoxylin and eosin (H&E) staining, proliferation index (MIB1) and FISH for ALK break apart probes. Images are taken at the stated magnification, scale bar = 100  $\mu$ M, 200  $\mu$ M for 4x.

**A**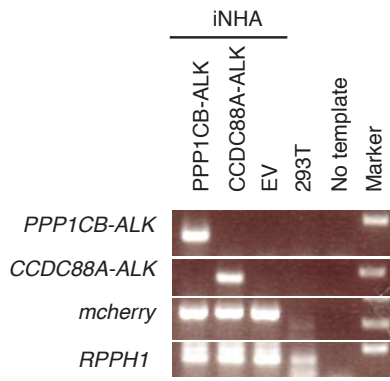**B**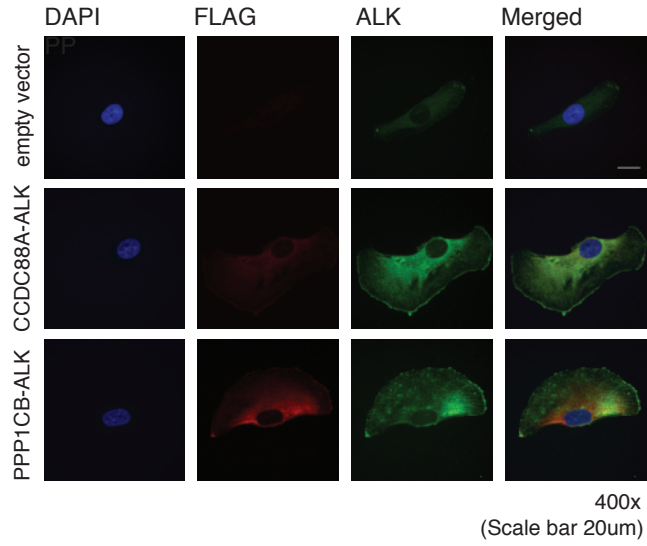**C**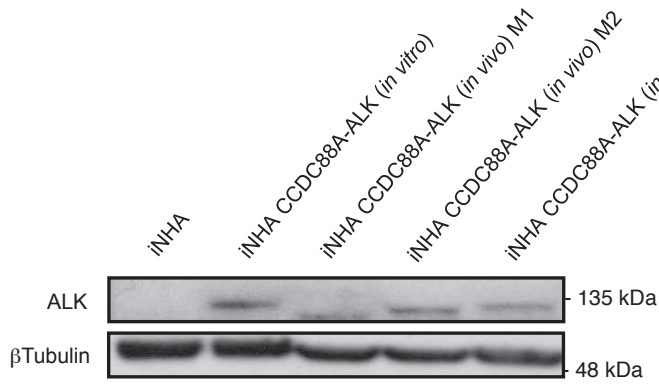**D**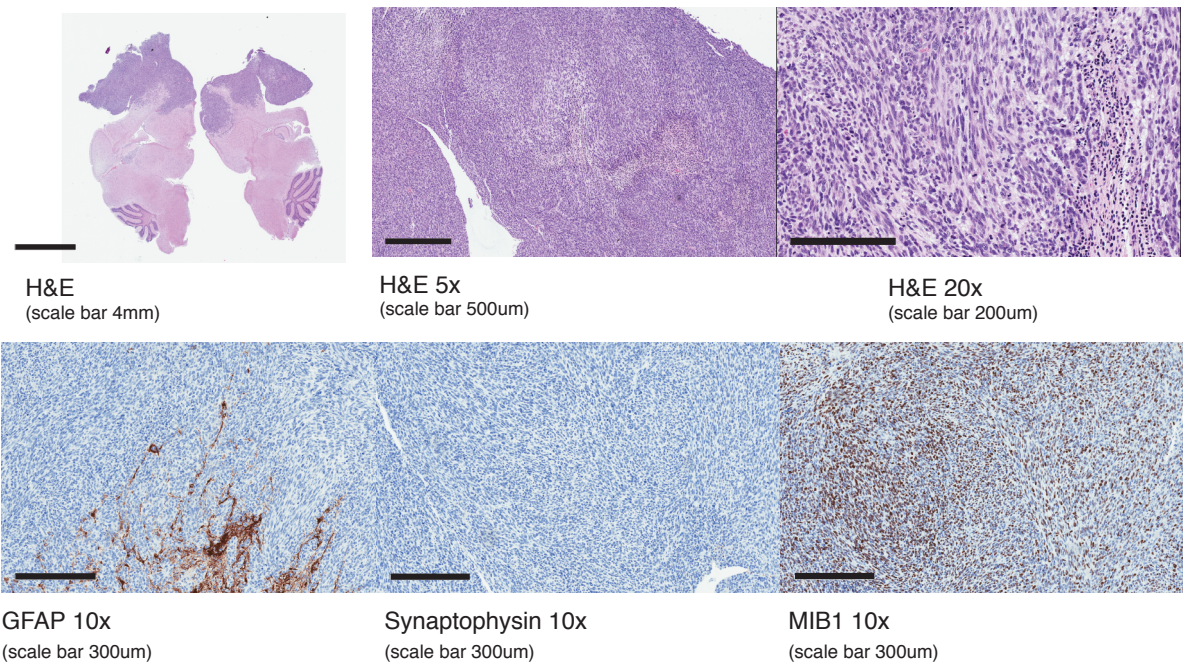

Supplementary Figure 3. (A) PCRs showing the presence of mcherry, CCDC88A-ALK and PPP1CB-ALK in the respective stable iNHA cell lines; gDNA of 293T and no template controls included. RPPH1 used as house-keeping control gene. Marker band displayed is reflective of 250 basepairs. (B) Immunofluorescence showing ALK and FLAG expression in iNHA cells transduced with the empty vector, CCDC88A-ALK and PPP1CB-ALK. Images were taken at 400x, scale bar = 20  $\mu$ M. (C) Western Blot showing overexpression of CCDC88A-ALK fusion protein. (D) Orthotopic xenografts of iNHAs overexpressing CCDC88A-ALK: Hemotoxylin and eosin (H&E) staining slides showing evidence of necrosis and multiple mitoses; GFAP focally positive, synaptophysin negative; proliferation index (MIB1) >50%. All images are taken at the stated magnification, scale bar = 100  $\mu$ M, 200  $\mu$ M for 4x unless otherwise specified in the figure.

A.

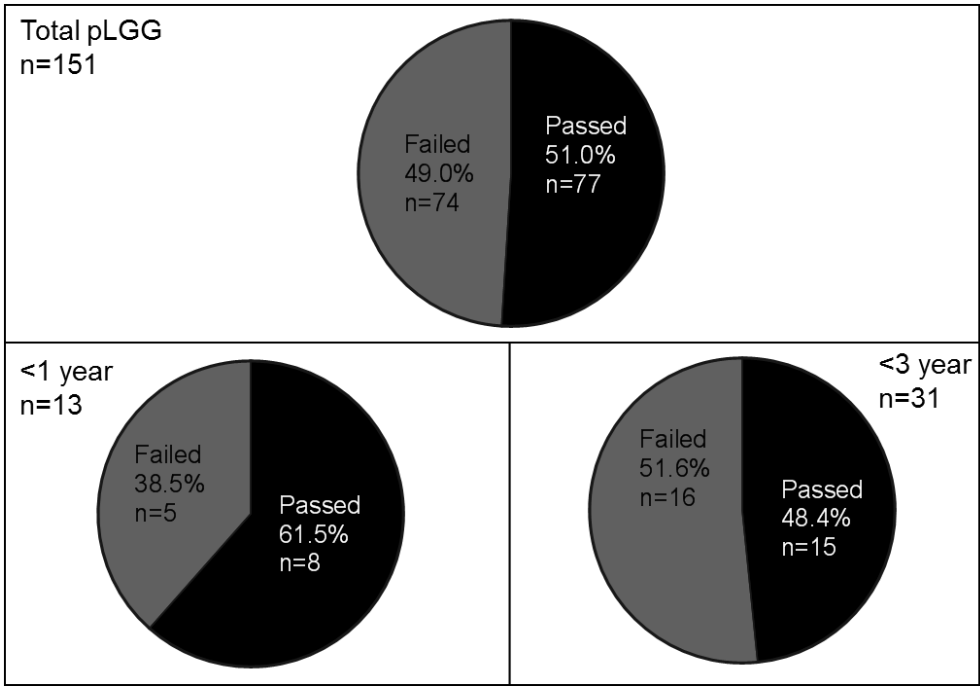

B.

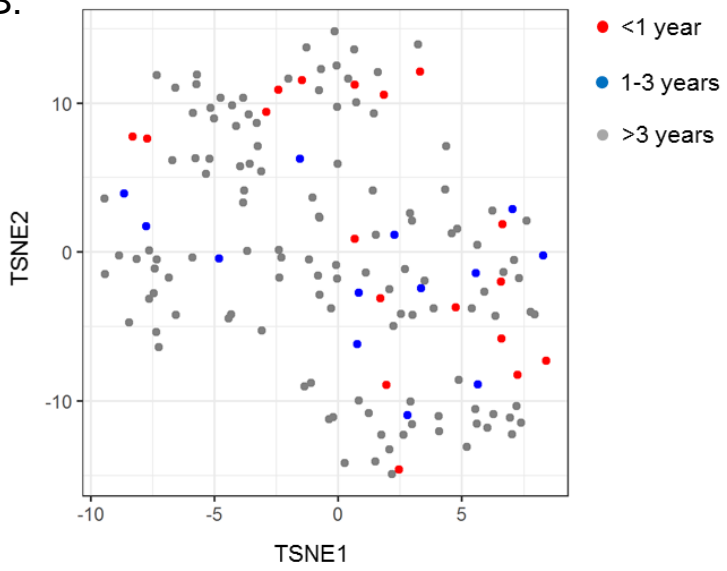

C.

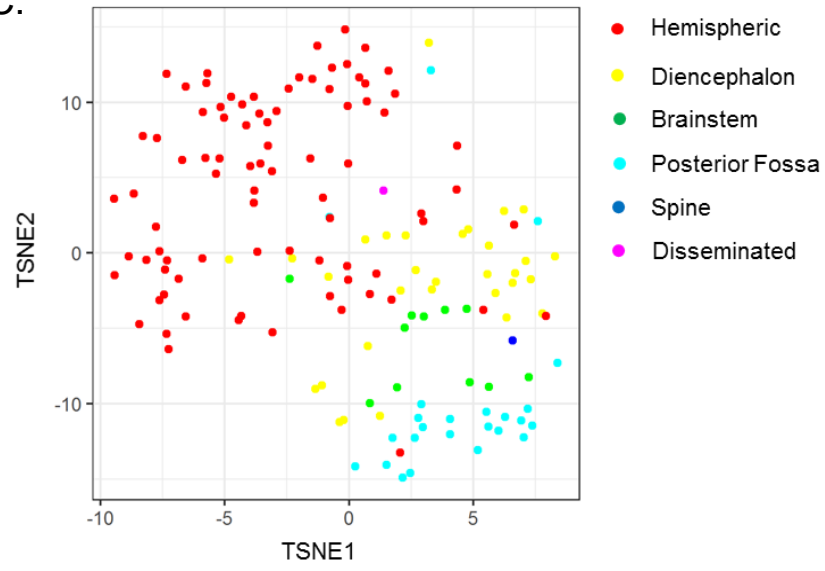

Supplementary Figure 4. Methylation classification of infant glioma as compared to older pediatric low-grade glioma (LGG) tumors. (A) A graphical breakdown of the success rate at which infant and pediatric samples are confidently assigned a CNS classification based on Capper, *et. al*, 2018. (B) T-SNE plot showing that infant and pediatric tumors do not cluster with one another based on methylation, indicative that they are unique clinical entities. (C) T-SNE plot showing that infant and pediatric tumors cluster more readily based on the tumor's location rather than outcome.

T-SNE: t-Distributed Stochastic Neighbor Embedding

| Characteristic                   |                       |                |
|----------------------------------|-----------------------|----------------|
| <b>Sex</b>                       |                       |                |
|                                  | Male                  | 73             |
|                                  | Female                | 69             |
| <b>Histology</b>                 |                       |                |
|                                  | Low Grade             | 104            |
|                                  | High Grade            | 33             |
|                                  | Mixed                 | 5              |
| <b>Location</b>                  |                       |                |
|                                  | Cerebral Hemispheres  | 71             |
|                                  | Diencephalon          | 52             |
|                                  | Posterior Fossa       | 8              |
|                                  | Brainstem             | 5              |
|                                  | Spinal Cord           | 6              |
| <b>Outcome</b>                   |                       |                |
|                                  | Alive                 | 97             |
|                                  | Deceased              | 42             |
|                                  | Unknown               | 3              |
| <b>Progression</b>               |                       |                |
|                                  | Progressed            | 84             |
|                                  | Stable                | 49             |
|                                  | Lost to Follow-Up     | 3              |
|                                  | Unknown               | 6              |
| <b>Extent of Surgery</b>         |                       |                |
|                                  | None                  | 3              |
|                                  | Biopsy                | 37             |
|                                  | Partial Resection     | 56             |
|                                  | Gross Total Resection | 41             |
|                                  | Unknown               | 5              |
| <b>Radiation</b>                 |                       |                |
|                                  | Yes                   | 18             |
|                                  | No                    | 115            |
|                                  | Unknown               | 9              |
| <b>Chemotherapy</b>              |                       |                |
|                                  | Yes                   | 81             |
|                                  | No                    | 53             |
|                                  | Unknown               | 8              |
| <b>Age at Diagnosis</b>          |                       |                |
|                                  | Median (months)       | 6.8 (0.0-14.6) |
|                                  | Mean (months)         | 6.7 ± 3.8      |
| <b>Progression-free Survival</b> |                       |                |
|                                  | Median (years)        | 1.2 (0.0-17.7) |
|                                  | Mean (years)          | 3.3 ± 4.3      |
| <b>Overall Survival</b>          |                       |                |
|                                  | Median (years)        | 4.6 (0.0-27.7) |
|                                  | Mean (years)          | 6.8 ± 7.0      |

Supplementary Table 1. Clinical characteristics of the entire infant glioma cohort

| Variable         |                        | Univariate |              |         | Multivariate |               |         |
|------------------|------------------------|------------|--------------|---------|--------------|---------------|---------|
|                  |                        | HR         | 95% C.I.     | p Value | HR           | 95% C.I.      | p Value |
| Overall          |                        |            |              |         |              |               |         |
|                  | Sex (Female)           | 0.976      | 0.42-2.268   | 0.955   | 0.875        | 0.245-3.121   | 0.837   |
|                  | Resection (Resected)   | 1.607      | 0.676-3.818  | 0.283   | 0.461        | 0.138-1.547   | 0.21    |
|                  | BRAF Fusion (Positive) | 0.826      | 0.305-2.234  | 0.707   | 0.746        | 0.179-3.111   | 0.688   |
|                  | BRAFV600E (Positive)   | 1.18       | 0.414-3.369  | 0.757   | 0.55         | 0.109-2.789   | 0.471   |
|                  | Chemotherapy (Yes)     | 1.157      | 0.981-3.514  | 0.796   | 0.253        | 0.06-1.069    | 0.062   |
|                  | Radiation (Yes)        | 0.826      | 0.269-2.533  | 0.738   | 0.305        | 0.064-1.445   | 0.135   |
|                  | Age (Infant)           | 12.839     | 2.957-55.753 | 0.001   | 27.084       | 3.882-188.982 | 0.001   |
| Progression-Free |                        |            |              |         |              |               |         |
|                  | Sex (Female)           | 1.384      | 0.869-2.204  | 0.171   | 1.36         | 0.728-2.542   | 0.335   |
|                  | Resection (Resected)   | 1.108      | 0.666-1.843  | 0.693   | 0.744        | 0.377-1.467   | 0.393   |
|                  | BRAF Fusion (Positive) | 0.934      | 0.554-1.574  | 0.798   | 1.21         | 0.498-2.937   | 0.674   |
|                  | BRAFV600E (Positive)   | 1.775      | 1.031-3.058  | 0.039   | 1.299        | 0.543-3.106   | 0.557   |
|                  | Chemotherapy (Yes)     | 4.506      | 2.15-9.441   | <0.0001 | 4.305        | 1.706-10.865  | 0.002   |
|                  | Radiation (Yes)        | 1.077      | 0.573-2.022  | 0.818   | 0.769        | 0.315-1.881   | 0.565   |
|                  | Age (Infant)           | 2.857      | 1.794-4.551  | <0.0001 | 2.386        | 1.154-4.934   | 0.019   |

Supplementary Table 2. Multivariate and univariate analysis of midline low-grade glioma

| Genes          | Exon 1 | Exon 2 | Event        | Gene ID 1      | Gene ID 2      |
|----------------|--------|--------|--------------|----------------|----------------|
| PPP1CB-ALK     | 5      | 20     | Fusion       | NM_002709.2    | NM_001353765.1 |
| CCDC88A-ALK    | 12     | 20     | Fusion       | NM_001135597.1 | NM_001353765.1 |
| EML4-ALK       | 2      | 20     | Fusion       | NM_019063.4    | NM_001353765.1 |
| KTN1-ALK       | 41     | 20     | Fusion       | NM_001271014.1 | NM_001353765.1 |
| CEP85L-ROS1    | 12     | 35     | Fusion       | NM_001042475.2 | NM_002944.2    |
| GOPC-ROS1      | 8      | 35     | Fusion       | NM_001017408.2 | NM_002944.2    |
| TPM3-NTRK1     | 1      | 12     | Fusion       | NM_001043351.1 | NM_001007792.1 |
| NFASC-NTRK1    | 22     | 12     | Fusion       | NM_001005388.2 | NM_001007792.1 |
| BCAN-NTRK1     | 13     | 13     | Fusion       | NM_021948.4    | NM_001007792.1 |
| TPM3-NTRK1     | 1      | 9      | Fusion       | NM_001043351.1 | NM_001007792.1 |
| VCL-NTRK2      | 16     | 12     | Fusion       | NM_003373.3    | NM_001007097.2 |
| NTRK2-MID1     | 7      | 7      | Fusion       | NM_001007097.2 | NM_000381.3    |
| AGBL4-NTRK2    | 6      | 16     | Fusion       | NM_001323573.1 | NM_001007097.2 |
| SLMAP-NTRK2    | 1      | 16     | Fusion       | NM_001304420.2 | NM_001007097.2 |
| NAV1-NTRK2     | 1      | 11     | Fusion       | NM_001167738.1 | NM_001007097.2 |
| NTRK3-ETV6     | 13     | 5      | Fusion       | NM_001007156.2 | NM_001987.4    |
| ETV6-NTRK3     | 1      | 14     | Fusion       | NM_001987.4    | NM_001007156.2 |
| BTBD1-NTRK3    | 1      | 14     | Fusion       | NM_001011885.1 | NM_001007156.2 |
| TGF-MET        | 5      | 15     | Fusion       | NM_001007565.2 | NM_000245.3    |
| CLIP2-MET      | 12     | 15     | Fusion       | NM_003388.4    | NM_000245.3    |
| PTPRZ1-MET     | 1      | 1      | Fusion       | NM_001206838.1 | NM_000245.3    |
| PTPRZ1-MET     | 2      | 1      | Fusion       | NM_001206838.1 | NM_000245.3    |
| PTPRZ1-MET     | 8      | 1      | Fusion       | NM_001206838.1 | NM_000245.3    |
| FGFR2-CTNNA3   | 17     | 14     | Fusion       | XM_017015925.1 | NM_001127384.2 |
| ERC1-FGFR2     | 2      | 18     | Fusion       | NM_001301248.1 | XM_017015925.1 |
| FGFR2-INA      | 17     | 2      | Fusion       | XM_017015925.1 | NM_032727.3    |
| FGFR2-KIAA1598 | 17     | 7      | Fusion       | XM_017015925.1 | N/A            |
| FGFR2-ERC1     | 17     | 3      | Fusion       | XM_017015925.1 | NM_001301248.1 |
| QKI-RAF1       | 3      | 7      | Fusion       | NM_001301085.1 | NM_001354689.1 |
| MYB-QKI        | 9      | 5      | Fusion       | NM_001130172.1 | NM_001354689.1 |
| MYB-QKI        | 11     | 5      | Fusion       | NM_001130172.1 | NM_001354689.1 |
| MYB-QKI        | 15     | 5      | Fusion       | NM_001130172.1 | NM_001354689.1 |
| ALK WT         | 14     | 18     | Reporter     | NM_001353765.1 |                |
| ALK MUT        | 21     | 27     | Reporter     | NM_001353765.1 |                |
| ROS1 WT        | 27     | 30     | Reporter     | NM_002944.2    |                |
| ROS1 MUT       | 37     | 41     | Reporter     | NM_002944.2    |                |
| NTRK2 WT       | 4      | 10     | Reporter     | NM_001007097.2 |                |
| NTRK2 MUT      | 17     | 20     | Reporter     | NM_001007097.2 |                |
| ABCF1          |        |        | Housekeeping | NM_001090.2    |                |
| ALAS1          |        |        | Housekeeping | NM_000688.4    |                |
| CLTC           |        |        | Housekeeping | NM_004859.2    |                |
| HPRT1          |        |        | Housekeeping | NM_000194.1    |                |

Supplementary Table 3. Fusion and reporter gene targets included on the NanoString 2 Panel used in this study. Exons, and transcript IDs are included
