# Supplementary material for: Alterations in ALK/ROS1/NTRK/MET drive a group of infantile hemispheric gliomas
Source: PubMed Central journal article supplement (PMC6761184; doi:10.1038/s41467-019-12187-5), 2019-09-25
Supplement: 41467_2019_12187_MOESM2_ESM.pdf [file 41467_2019_12187_MOESM2_ESM.pdf]

## Reporting Summary

Nature Research wishes to improve the reproducibility of the work that we publish. This form provides structure for consistency and transparency in reporting. For further information on Nature Research policies, see [Authors & Referees](#) and the [Editorial Policy Checklist](#).

### Statistics

For all statistical analyses, confirm that the following items are present in the figure legend, table legend, main text, or Methods section.

n/a Confirmed

- |                                     |                                     |                                                                                                                                                                                                                                                            |
|-------------------------------------|-------------------------------------|------------------------------------------------------------------------------------------------------------------------------------------------------------------------------------------------------------------------------------------------------------|
| <input type="checkbox"/>            | <input checked="" type="checkbox"/> | The exact sample size ( $n$ ) for each experimental group/condition, given as a discrete number and unit of measurement                                                                                                                                    |
| <input type="checkbox"/>            | <input checked="" type="checkbox"/> | A statement on whether measurements were taken from distinct samples or whether the same sample was measured repeatedly                                                                                                                                    |
| <input type="checkbox"/>            | <input checked="" type="checkbox"/> | The statistical test(s) used AND whether they are one- or two-sided<br><i>Only common tests should be described solely by name; describe more complex techniques in the Methods section.</i>                                                               |
| <input type="checkbox"/>            | <input checked="" type="checkbox"/> | A description of all covariates tested                                                                                                                                                                                                                     |
| <input checked="" type="checkbox"/> | <input type="checkbox"/>            | A description of any assumptions or corrections, such as tests of normality and adjustment for multiple comparisons                                                                                                                                        |
| <input type="checkbox"/>            | <input checked="" type="checkbox"/> | A full description of the statistical parameters including central tendency (e.g. means) or other basic estimates (e.g. regression coefficient) AND variation (e.g. standard deviation) or associated estimates of uncertainty (e.g. confidence intervals) |
| <input type="checkbox"/>            | <input checked="" type="checkbox"/> | For null hypothesis testing, the test statistic (e.g. $F$ , $t$ , $r$ ) with confidence intervals, effect sizes, degrees of freedom and $P$ value noted<br><i>Give <math>P</math> values as exact values whenever suitable.</i>                            |
| <input checked="" type="checkbox"/> | <input type="checkbox"/>            | For Bayesian analysis, information on the choice of priors and Markov chain Monte Carlo settings                                                                                                                                                           |
| <input checked="" type="checkbox"/> | <input type="checkbox"/>            | For hierarchical and complex designs, identification of the appropriate level for tests and full reporting of outcomes                                                                                                                                     |
| <input checked="" type="checkbox"/> | <input type="checkbox"/>            | Estimates of effect sizes (e.g. Cohen's $d$ , Pearson's $r$ ), indicating how they were calculated                                                                                                                                                         |

*Our web collection on [statistics for biologists](#) contains articles on many of the points above.*

### Software and code

Policy information about [availability of computer code](#)

Data collection

Data collection was completed as per each contributing institution's guidelines for clinical data acquisition. The data was provided to the referencing centre (Hospital for Sick Children) via a standard Microsoft Excel 2010 file where it was combined and securely stored.

Data analysis

Statistical analyses were performed using R version 3.5.0. and R Commander Version 2.4-4 with the plugins "Survival" (version 1.2-0), "KMggplot2" (version 0.2-5) and "Plot by Group" (version 0.1-0). No additional custom software was used.

For manuscripts utilizing custom algorithms or software that are central to the research but not yet described in published literature, software must be made available to editors/reviewers. We strongly encourage code deposition in a community repository (e.g. GitHub). See the Nature Research [guidelines for submitting code & software](#) for further information.

### Data

Policy information about [availability of data](#)

All manuscripts must include a [data availability statement](#). This statement should provide the following information, where applicable:

- Accession codes, unique identifiers, or web links for publicly available datasets
- A list of figures that have associated raw data
- A description of any restrictions on data availability

This manuscript contains the following as a data availability statement: The targeted and whole transcriptome sequencing data sets have been deposited in the European-Genome-phenome Archive under accession code EGAS00001003714. All other relevant data are available from the corresponding author upon request.

## Field-specific reporting

Please select the one below that is the best fit for your research. If you are not sure, read the appropriate sections before making your selection.

- Life sciences     Behavioural & social sciences     Ecological, evolutionary & environmental sciences

For a reference copy of the document with all sections, see [nature.com/documents/nr-reporting-summary-flat.pdf](https://nature.com/documents/nr-reporting-summary-flat.pdf)

## Life sciences study design

All studies must disclose on these points even when the disclosure is negative.

|                 |                                                                                                                                                                                                                                                                                                                                                                                                                                                                                                                                                                               |
|-----------------|-------------------------------------------------------------------------------------------------------------------------------------------------------------------------------------------------------------------------------------------------------------------------------------------------------------------------------------------------------------------------------------------------------------------------------------------------------------------------------------------------------------------------------------------------------------------------------|
| Sample size     | This manuscript aimed to molecularly characterize a critically under-represented demographic of infant gliomas. As such, we contacted collaborators in an attempt to accrue as many samples fitting this demographic as possible, and hence no "hard" sample size was set. As this collection represents the largest cohort of infant gliomas to our knowledge, we believe it to be of sufficient number to conclude on both the molecular and clinical trends observed. The number of samples reported on in each section of the manuscript is explicitly noted in the text. |
| Data exclusions | Data exclusion, as described in the text, was based on histological review revealing either no tumour present or a non-glioma diagnosis. A further set of samples were excluded due to insufficient biological material to garner experimental results. We also excluded patients diagnosed prior to 1985, as our past experience suggests that molecular characterization prior to this age to be exceedingly difficult.                                                                                                                                                     |
| Replication     | All clinical findings are concluded on the largest cohort of infant gliomas assembled, to the best of our knowledge. We anticipate the replication of our clinical findings as additional samples are acquired from other institutions in the future. All in vitro experiments were completed in both technical and biological replicates to ensure validity. In vivo work was completed with randomized mouse groups and blinded end-point monitoring. All injections were completed in the same manner within the same 12 hour period.                                      |
| Randomization   | Randomization for the clinical aspects of this study was not completed, as the cohort as a whole was reported on. For the mice experiment, age and gender matched mice were randomly assigned to the experimental and control groups by a third party.                                                                                                                                                                                                                                                                                                                        |
| Blinding        | Blinding of the researchers for the clinical portions of this study was not required. For mice work, endpoint monitoring was completed by technical services at our animal facility with no prior knowledge to which group each mouse was assigned to. Endpoints were defined by the same individual to ensure the absence of observer bias.                                                                                                                                                                                                                                  |

## Reporting for specific materials, systems and methods

We require information from authors about some types of materials, experimental systems and methods used in many studies. Here, indicate whether each material, system or method listed is relevant to your study. If you are not sure if a list item applies to your research, read the appropriate section before selecting a response.

### Materials & experimental systems

| n/a                                 | Included in the study                                           |
|-------------------------------------|-----------------------------------------------------------------|
| <input type="checkbox"/>            | <input checked="" type="checkbox"/> Antibodies                  |
| <input type="checkbox"/>            | <input checked="" type="checkbox"/> Eukaryotic cell lines       |
| <input checked="" type="checkbox"/> | <input type="checkbox"/> Palaeontology                          |
| <input type="checkbox"/>            | <input checked="" type="checkbox"/> Animals and other organisms |
| <input checked="" type="checkbox"/> | <input type="checkbox"/> Human research participants            |
| <input type="checkbox"/>            | <input checked="" type="checkbox"/> Clinical data               |

### Methods

| n/a                                 | Included in the study                           |
|-------------------------------------|-------------------------------------------------|
| <input checked="" type="checkbox"/> | <input type="checkbox"/> ChIP-seq               |
| <input checked="" type="checkbox"/> | <input type="checkbox"/> Flow cytometry         |
| <input checked="" type="checkbox"/> | <input type="checkbox"/> MRI-based neuroimaging |

## Antibodies

### Antibodies used

1. Anti-ALK (D5F3(R)) XP(R) Rabbit mAb. Cell Signaling. Lot: 9 Cat: 3633
2. Anti-p44/42 MAPK (ERK1/2) Rabbit Ab, Cell Signaling, Lot: 27, Cat: 9102
3. Anti-P-p44/42 MAPK (T202/Y204) Rabbit Ab, Cell Signaling, Lot: 30, Cat: 9101
4. Anti-FLAG M2, Sigma, Lot: SLBS3530V, Cat: F1804
5. Tubulin (DM1A) Mouse mAb, Cell Signaling, Lot: 17, Cat: 2144
6. RTU anti-MIB-1 (mouse monoclonal primary antibody, ready-to-use, Dako Omnis), Cat: GA626
7. RTU anti-Synaptophysin (mouse monoclonal primary antibody, ready-to-use, Dako Omnis), Cat: GC202
8. RTU anti-GFAP (rabbit polyclonal primary antibody, ready-to-use, Dako Omnis), Cat: GA524

### Validation

1. <https://www.cellsignal.com/products/primary-antibodies/alk-d5f3-xp-rabbit-mab/3633>
2. <https://www.cellsignal.com/products/primary-antibodies/p44-42-mapk-erk1-2-antibody/9102>
3. <https://www.cellsignal.com/products/primary-antibodies/phospho-p44-42-mapk-erk1-2-thr202-tyr204-antibody/9101>
4. <https://www.sigmaaldrich.com/catalog/product/sigma/f1804?lang=en&region=CA>
5. <https://www.cellsignal.com/products/primary-antibodies/a-tubulin-antibody/2144>
6. [https://www.agilent.com/en/product/immunohistochemistry/antibodies-controls/primary-antibodies/ki-67-antigen-\(dako](https://www.agilent.com/en/product/immunohistochemistry/antibodies-controls/primary-antibodies/ki-67-antigen-(dako)

omnis)-76239  
 7. [https://www.agilent.com/en/product/immunohistochemistry/antibodies-controls/primary-antibodies/synaptophysin-\(dako-omnis\)-76264](https://www.agilent.com/en/product/immunohistochemistry/antibodies-controls/primary-antibodies/synaptophysin-(dako-omnis)-76264)  
 8. [https://www.agilent.com/en/product/immunohistochemistry/antibodies-controls/primary-antibodies/glial-fibrillary-acidic-protein-\(dako-omnis\)-76214](https://www.agilent.com/en/product/immunohistochemistry/antibodies-controls/primary-antibodies/glial-fibrillary-acidic-protein-(dako-omnis)-76214)

## Eukaryotic cell lines

Policy information about [cell lines](#)

|                                                                   |                                                                                                                                                                                                                                                                                                                                                                |
|-------------------------------------------------------------------|----------------------------------------------------------------------------------------------------------------------------------------------------------------------------------------------------------------------------------------------------------------------------------------------------------------------------------------------------------------|
| Cell line source(s)                                               | Immortalized normal human astrocytes were a gift from a collaborator that have since been cultured in our lab. Reference of collaborator: Sonoda, Y. et al. Formation of intracranial tumors by genetically modified human astrocytes defines four pathways critical in the development of human anaplastic astrocytoma. <i>Cancer Res</i> 61, 4956-60 (2001). |
| Authentication                                                    | Cell lines were not authenticated.                                                                                                                                                                                                                                                                                                                             |
| Mycoplasma contamination                                          | Cells lines were not tested for mycoplasma, but are routinely treated with "MycoZap" (Lonza, Germany). Cat #: VZA-2031. Lot: 923D1126 to ensure the absence of mycoplasma contamination.                                                                                                                                                                       |
| Commonly misidentified lines (See <a href="#">ICLAC</a> register) | No commonly misidentified cell lines were used in this study.                                                                                                                                                                                                                                                                                                  |

## Animals and other organisms

Policy information about [studies involving animals](#); [ARRIVE guidelines](#) recommended for reporting animal research

|                         |                                                                                                                                                                                          |
|-------------------------|------------------------------------------------------------------------------------------------------------------------------------------------------------------------------------------|
| Laboratory animals      | Nod/Scid/Gamma mice were injected at 8 weeks of age. All male mice were used.                                                                                                            |
| Wild animals            | This study did not involve wild animals.                                                                                                                                                 |
| Field-collected samples | This study did not involve field-collected samples.                                                                                                                                      |
| Ethics oversight        | The study was approved by the Animal Care Committee at The Centre for Phenogenomics (Toronto, ON, CAN), the animal facility partner at the Hospital for Sick Children (Toronto, ON, CAN) |

Note that full information on the approval of the study protocol must also be provided in the manuscript.

## Clinical data

Policy information about [clinical studies](#)

All manuscripts should comply with the ICMJE [guidelines for publication of clinical research](#) and a completed [CONSORT checklist](#) must be included with all submissions.

|                             |                                                                                                                                                                                                                                                   |
|-----------------------------|---------------------------------------------------------------------------------------------------------------------------------------------------------------------------------------------------------------------------------------------------|
| Clinical trial registration | This study did not include a clinical trial.                                                                                                                                                                                                      |
| Study protocol              | This study was not include a clinical trial                                                                                                                                                                                                       |
| Data collection             | Clinical data collected was provided by the treating oncologist at each respective institution. Histological grade and post-operative information was provided by the providing institutes pathologist and neurosurgeon/oncologist, respectively. |
| Outcomes                    | Outcome data was provided by the contributing institution. Progression events were defined as changes in clinical behavior and/or tumor that resulted in a change of clinical management as determined by the treating physician.                 |
